# Supplementary material
Source: HighWire-hosted journal article supplement (http://jpet.aspetjournals.org/highwire/filestream/147321/field_highwire_adjunct_files/0/266049SupplData.pdf)
Supplement: 266049SupplData.pdf [file 266049SupplData.pdf]

For Journal of Pharmacology and Experimental Therapeutics (revised)

6 April 2020

**Efficacy of crizotinib and selumetinib combination treatment in an *in vivo* xenograft model of ALK-positive lung cancer**

Shrestha, N., Bland, A., Bower, R.L., Rosengren, R.J., Ashton, J.C<sup>1</sup>.

Department of Pharmacology & Toxicology, School of Biomedical Sciences, University of Otago, Dunedin, New Zealand.

1. Corresponding author

+6434793040

john.ashton@otago.ac.nz

**Running Head: Efficacy of crizotinib and selumetinib combination therapy.**

**Keywords:** Crizotinib; Selumetinib; ALK-positive lung cancer; Combination treatment

**Table S1: Body weight and organ weight of Balb/c mice**

|                                        | <b>Vehicle control</b> | <b>Crizotinib 25 mg/kg</b> | <b>Selumetinib 25mg/kg</b> | <b>Crizotinib+ Selumetinib</b> |
|----------------------------------------|------------------------|----------------------------|----------------------------|--------------------------------|
| <b>Body Weight Change (g)</b>          | -1.23 ± 0.35           | -0.28 ± 0.41               | 0.55 ± 0.73                | 0.8 ± 0.23                     |
| <b>Organ Weight (% of Body Weight)</b> |                        |                            |                            |                                |
| <b>Liver</b>                           | 5.60 ± 0.22            | 5.22 ± 0.22                | 4.92 ± 0.76                | 5.33 ± 0.20                    |
| <b>Spleen</b>                          | 0.27 ± 0.008           | 0.28 ± 0.02                | 0.28 ± 0.02                | 0.29 ± 0.01                    |
| <b>Lungs</b>                           | 1.15 ± 0.14            | 0.99 ± 0.15                | 0.87 ± 0.32                | 0.89 ± 0.08                    |
| <b>Heart</b>                           | 0.61 ± 0.083           | 0.57 ± 0.06                | 0.55 ± 0.04                | 0.55 ± 0.03                    |
| <b>Kidneys</b>                         | 2.02 ± 0.04            | 2.02 ± 0.09                | 1.89 ± 0.09                | 1.92 ± 0.03                    |
| <b>Testes</b>                          | 0.70 ± 0.14            | 0.65 ± 0.05                | 0.93 ± 0.25                | 0.69 ± 0.01                    |

Statistical significance was determined by one-way- ANOVA with Bonferroni post-hoc test. All data are presented as mean ± SEM from n = 6. Multiple comparison among treatment groups and vehicle did not show significant difference in both body and organ weight (p > 0.05).

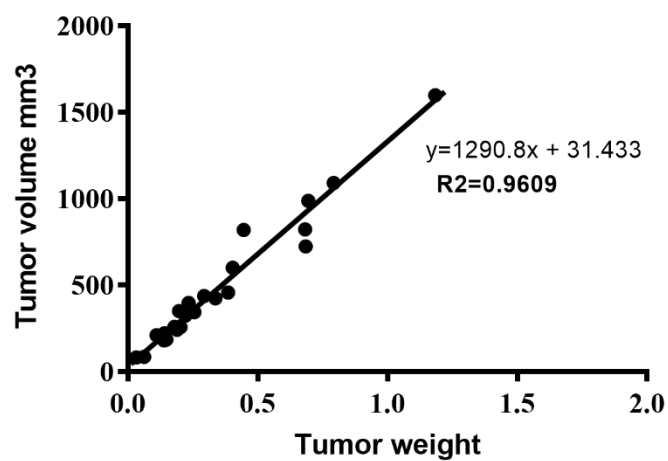

**Figure S1: Correlation between tumour volume and tumour weight.**

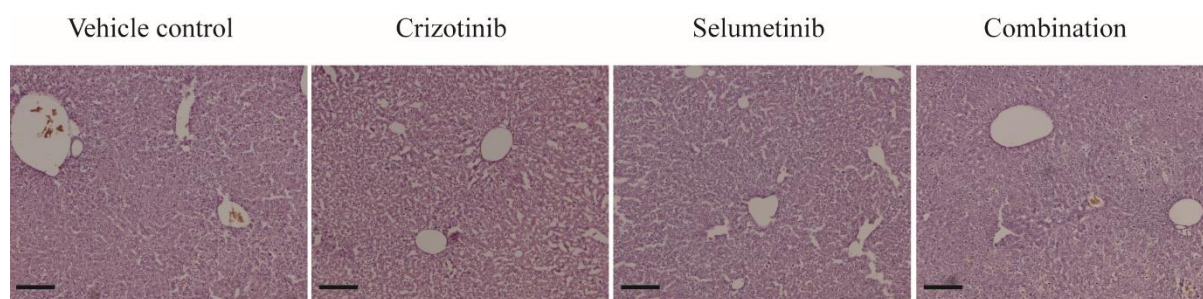

**Figure S2 : H and E staining of liver sections.** Representative micrographs taken at 10x. Scale bar: 100  $\mu$ m.
